# Supplementary figures and images for: Administration ofBifidobacterium brevePS12929 andLactobacillus salivariusPS12934, Two Strains Isolated from Human Milk, to Very Low and Extremely Low Birth Weight Preterm Infants: A Pilot Study
Source: Hindawi journal article supplement (doi:10.1155/2015/538171), 2015-01-01

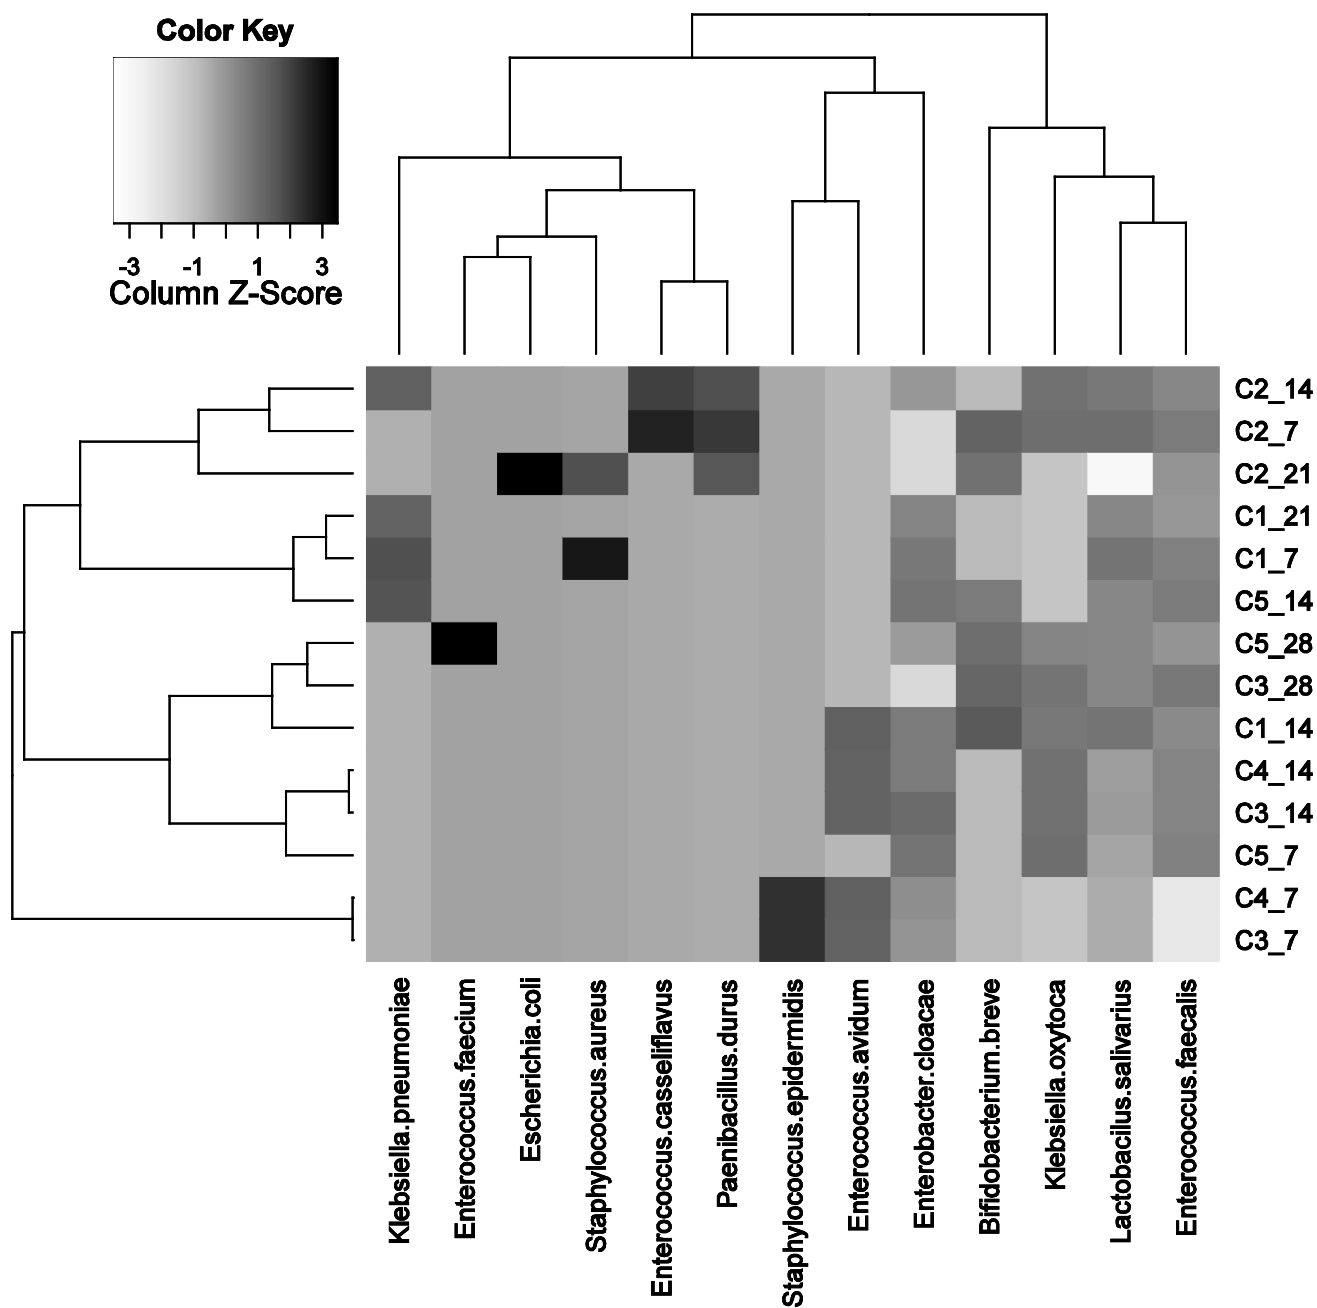

Supplement: f1 [file 538171.f1.zip]
